# Supplementary material for: Durable superamphiphobic coatings from one-step electrostatic dusting
Source: Royal Society of Chemistry journal article supplement (doi:10.1039/c9sm01278h), 2019-01-01
Supplement: c9sm01278h1.pdf [file c9sm01278h1.pdf]

## Durable superamphiphobic coatings from one-step electrostatic dusting

*Youfa Zhang\**, Zhen Xiao, Chengzhi Liu, Xinquan Yu

Jiangsu Key Laboratory of Advanced Metallic Materials, School of Materials Science and Engineering, Southeast

University, Nanjing 211189, P. R. China

\*corresponding author: E-mail: yfzhang@seu.edu.cn (Y. Z.)

### Supporting Information

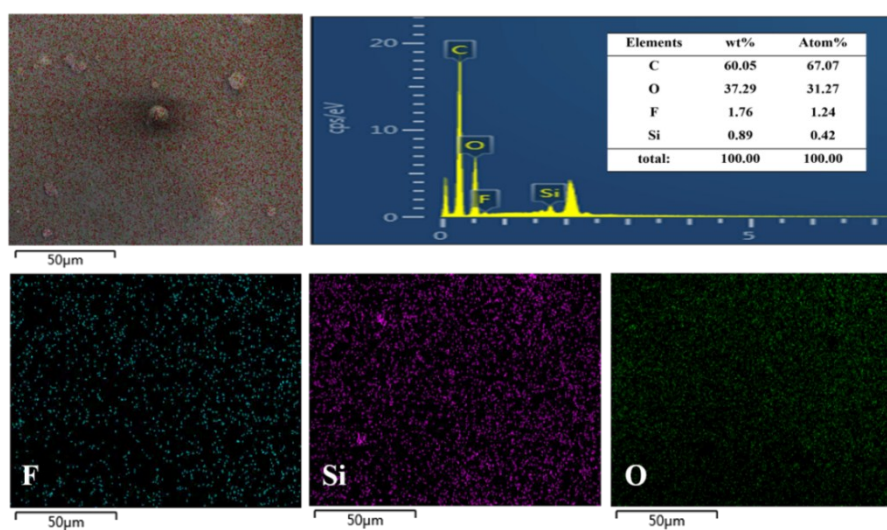

**Fig. S1** EDS mapping images of F, Si and O elements of coatings.

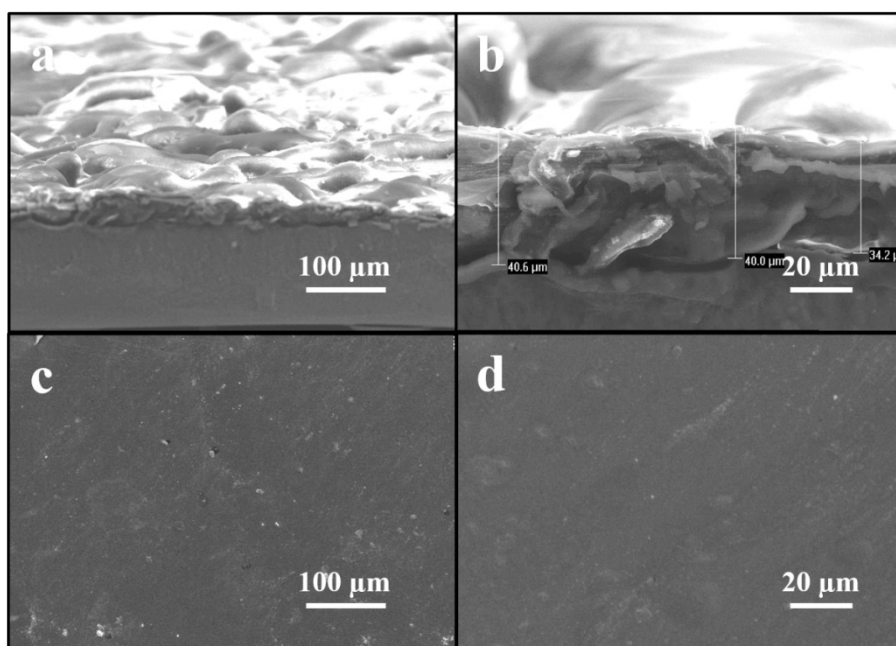

**Fig. S2** SEM images of (a, b) cross section of SiO<sub>2</sub>/PMMA coatings and surface of (c, d) PMMA resin.

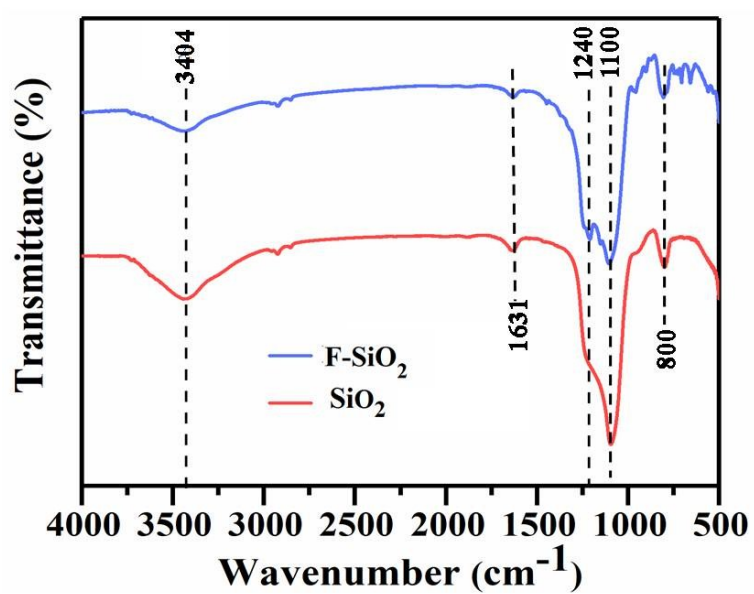

**Fig. S3** FTIR spectra of nano-SiO<sub>2</sub> particles before and after modification.

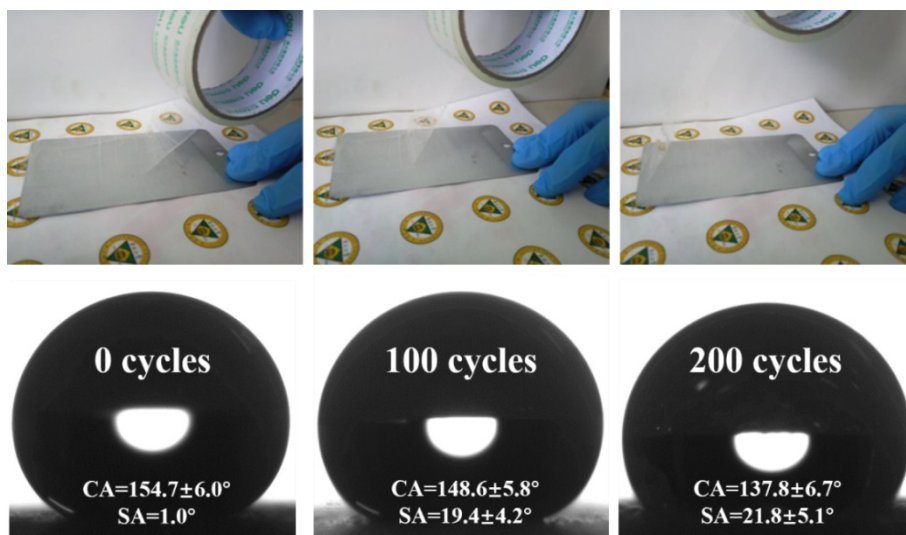

**Fig. S4** Illustration of the tape peeling test for superamphiphobic surface and the wettability of oil after 0, 100, 200 cycles.

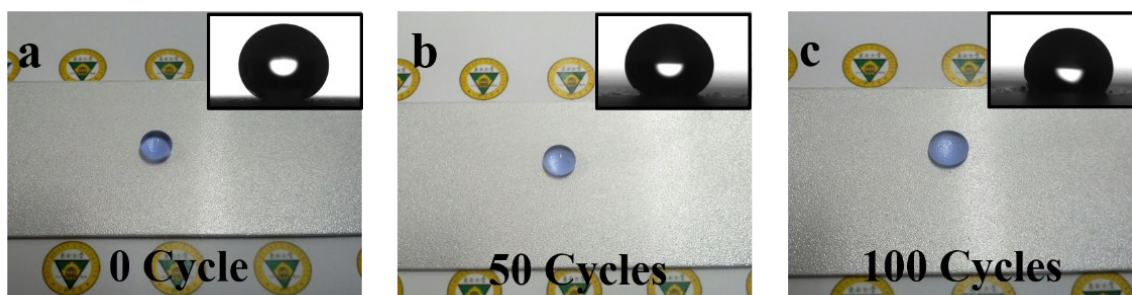

**Fig. S5** Wetting behavior of coatings after abrasion of tester for (a) 0, (b) 50 and (c) 100 cycles.

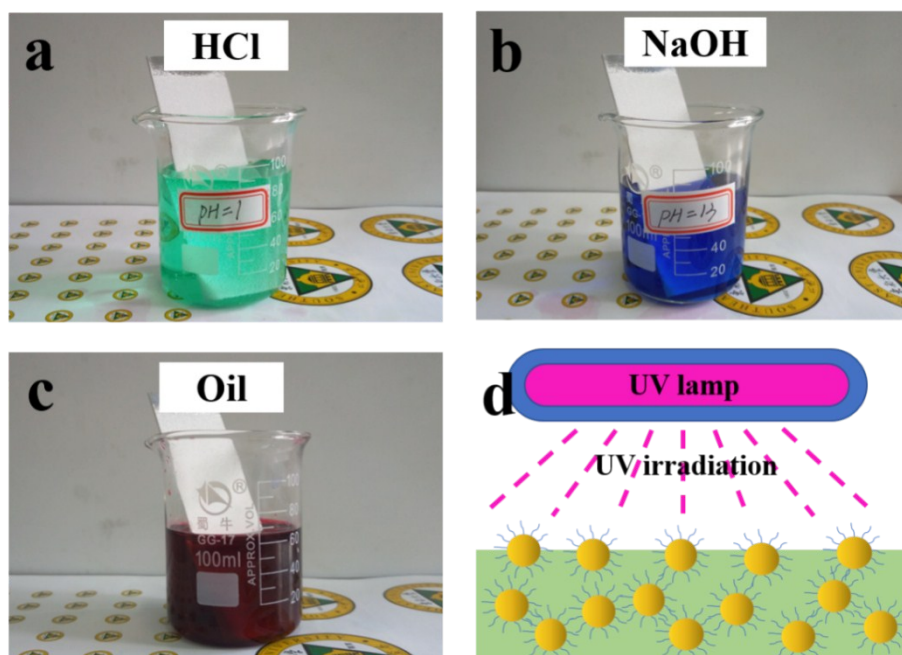

**Fig. S6** Schematic diagrams of superamphiphobic coatings soaking in (a) acid, (b) alkali, (c) oil and (d) UV-irradiation .

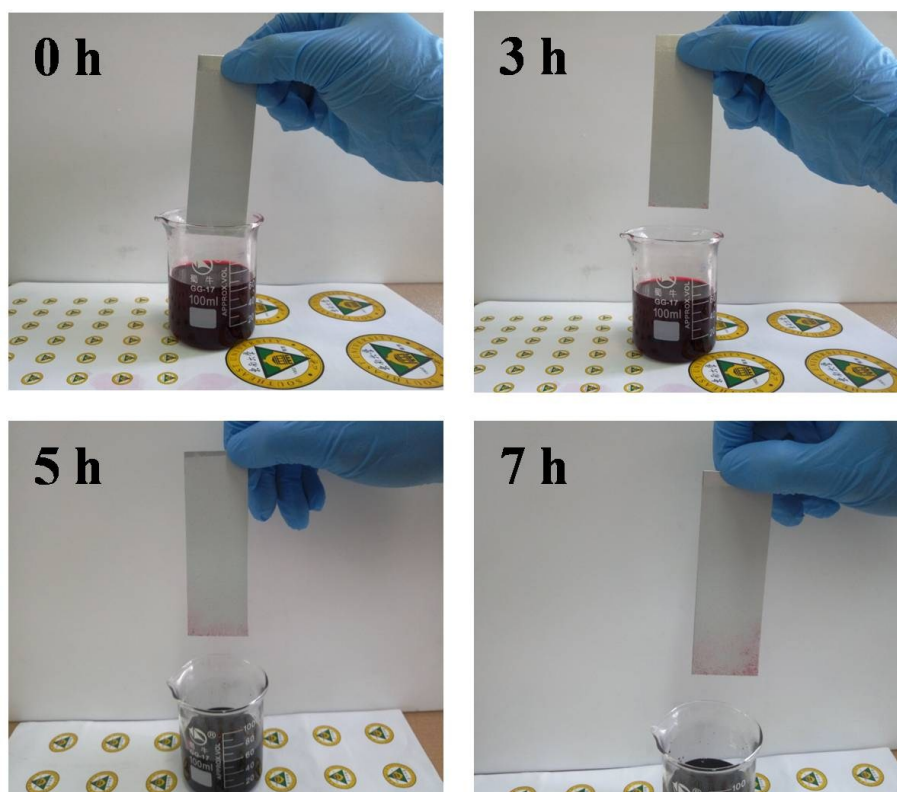

**Fig. S7** Illustration of the oil soaking test for superamphiphobic surface after 0, 3, 5, 7 h, respectively.
